# Supplementary material for: A reversible and highly conductive adhesive: towards self-healing and recyclable flexible electronics
Source: Royal Society of Chemistry journal article supplement (doi:10.1039/c9tc06765e), 2020-01-01
Supplement: c9tc06765e1.pdf [file c9tc06765e1.pdf]

## Reversible and Highly Conductive Adhesive: Towards Self-Healing and Recyclable Flexible Electronics

Qiming Yan Meng Zhou Heqing Fu\*

School of Chemistry and Chemical Engineering, Guangdong Provincial Key Lab of Green Chemical Product Technology, South China University of Technology, Guangzhou 510640, P.R. China;

\*Corresponding author. Tel: +86 020 87114919; fax: +86 020 87112047.

E-mail: fuhq@scut.edu.cn .

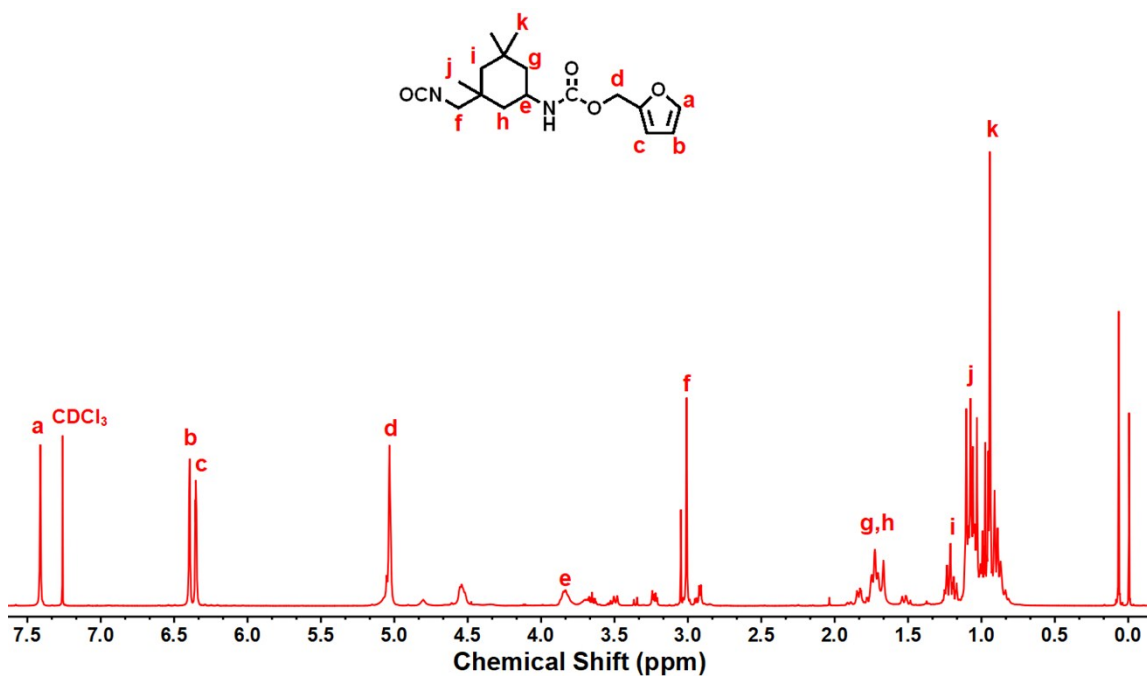

**Figure S1.** <sup>1</sup>H NMR spectrum of furan-based blocking agent in CDCl<sub>3</sub> (400MHz).

In the <sup>1</sup>H NMR spectrum of furan-based blocking agent, the peaks at 5.0~7.5 ppm correspond to the furan ring. The peaks at 0.9~3.9 ppm are

attributed to the IPDI alkyl unit[1].

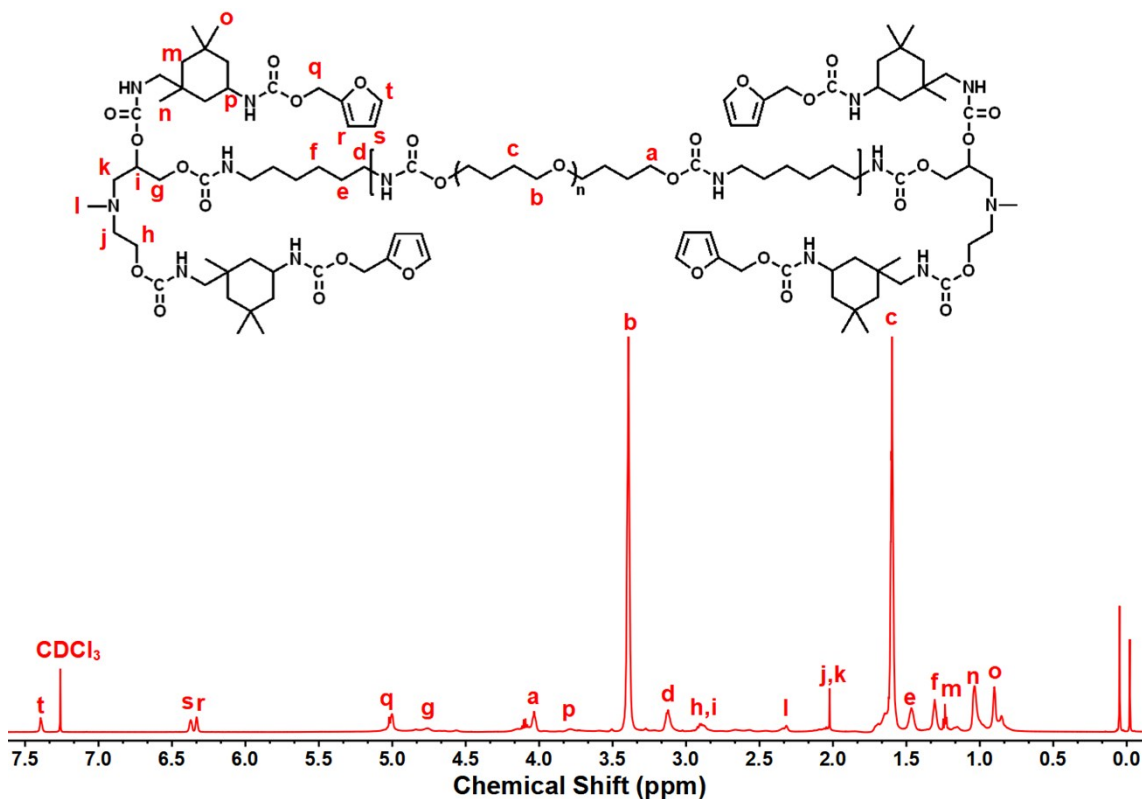

**Figure S2.** <sup>1</sup>H NMR spectrum of F4PU resin in CDCl<sub>3</sub> (400MHz).

Comparing to the <sup>1</sup>H NMR spectrum of furan-based blocking agent, the new peaks at 1.60, 3.39 and 4.03 ppm are assigned to the PTMEG unit, the peaks at 1.30, 1.46 and 3.12 ppm are attributed to the HDI unit, the peaks of 2-(methylamino) ethanol protons appear at 2.02~2.89 ppm, and the peaks of glycidol protons appear at 2.02, 2.89 and 4.76 ppm[2].

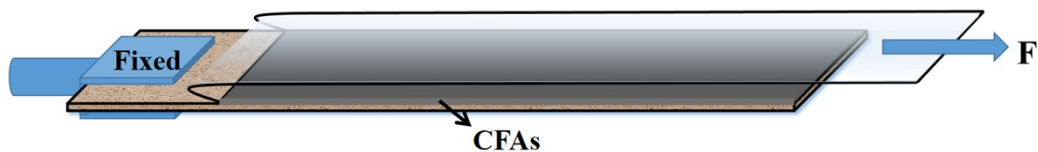

**Figure S3.** The model of 180° peeling test for RCFA.

**Table S1.** The loading amount of Ag nanoparticles and the conductivity of Ag@MWCNTs.

| Samples                                                            | Ag@MWCNTs (0h)  | Ag@MWCNTs (4h)  | Ag@MWCNTs (8h)  | Ag@MWCNTs (12h) |
|--------------------------------------------------------------------|-----------------|-----------------|-----------------|-----------------|
| Ag concentration in DMF (original, wt%)                            | 1.05            | 1.05            | 1.05            | 1.05            |
| Ag concentration in DMF (after mixing, wt%)                        | 1.05            | 1.03            | 1.01            | 0.98            |
| Loading amount (wt%)                                               | 0               | 3.78            | 7.56            | 13.23           |
| Electrical resistivity ( $\times 10^{-2} \Omega \cdot \text{cm}$ ) | 1.53 $\pm$ 0.05 | 1.12 $\pm$ 0.03 | 0.94 $\pm$ 0.05 | 0.48 $\pm$ 0.04 |

**Table S2.** Comparison of the self-healing behavior between RCFA samples and other self-healing materials.

| Polymer | Type of dynamic bond      | Self-healing Condition    | Self-healing | Ref       |
|---------|---------------------------|---------------------------|--------------|-----------|
| PA      | imine bond                | room temperature for 24 h | ~92%         | 3         |
| SBR     | boronic ester bond        | 80 °C for 24 h            | >80%         | 4         |
|         | ionic hydrogen bond       | room temperature for 12 h | ~90%         | 5         |
|         | DA bond                   | 120 °C for 20 min         | >90%         | 6         |
| PU      | disulfide bond            | room temperature for 24 h | 97%          | 7         |
|         | carbon-carbon bond        | 50 °C for 24 h            | ~100%        | 8         |
|         | $\pi$ - $\pi$ interaction | room temperature for 12 h | ~100%        | 9         |
| PDMS    | metal-ligand bond         | room temperature for 48 h | ~90%         | 10        |
|         | disulfide bond            | UV for 48 h               | ~84%         | 11        |
| PB      | carbon-carbon double bond | room temperature for 1 h  | ~100%        | 12        |
| EP      | disulfide bond            | 60 °C for 1 h             | ~90%         | 13        |
| PU      | DA bond                   | NIR for 20 min            | ~92%         | this work |

**Table S3. Mechanical Properties of Original and Self-healed RCFA<sup>a</sup>**

| Samples | Original          |              | Healed by heating |              |                         | Healed by NIR     |              |                         |
|---------|-------------------|--------------|-------------------|--------------|-------------------------|-------------------|--------------|-------------------------|
|         | Ultimate strength | Break strain | Ultimate strength | Break strain | Self-healing efficiency | Ultimate strength | Break strain | Self-healing efficiency |
|         | (MPa)             | (%)          | (MPa)             | (%)          | (%)                     | (MPa)             | (%)          | (%)                     |
| RCFA0   | 10.09±1.1         | 821±34       | 9.61±1.9          | 785±29       | 95.24                   | 9.43±2.1          | 783±36       | 93.46                   |
| RCFA1   | 14.10±1.8         | 743±26       | 12.75±2.2         | 694±33       | 90.43                   | 12.88±2.8         | 695±31       | 91.35                   |
| RCFA2   | 14.79±2.3         | 603±24       | 13.32±2.3         | 529±24       | 90.06                   | 13.63±2.6         | 523±27       | 92.16                   |
| RCFA3   | 15.95±3.3         | 572±18       | 13.66±2.9         | 401±16       | 85.64                   | 14.12±3.3         | 531±25       | 88.53                   |
| RCFA4   | 14.90±3.4         | 401±20       | 11.77±4.1         | 332±19       | 78.99                   | 12.92±2.9         | 349±16       | 86.71                   |

<sup>a</sup>The average values were obtained from more than 4 samples.

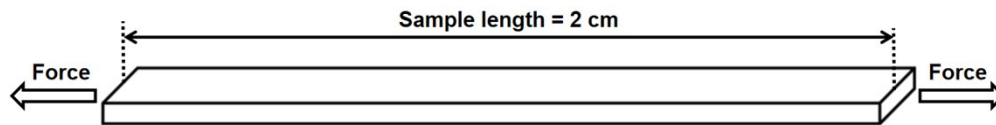

**Figure S4.** Schematic illustration of the stretching deformation.

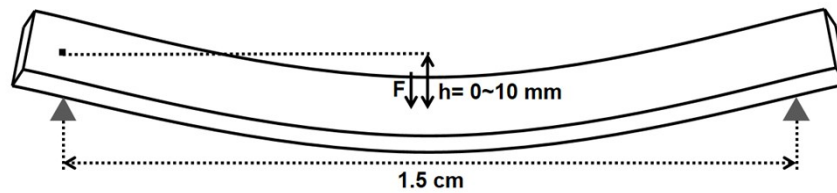

**Figure S5.** Schematic illustration of the bending deformation.

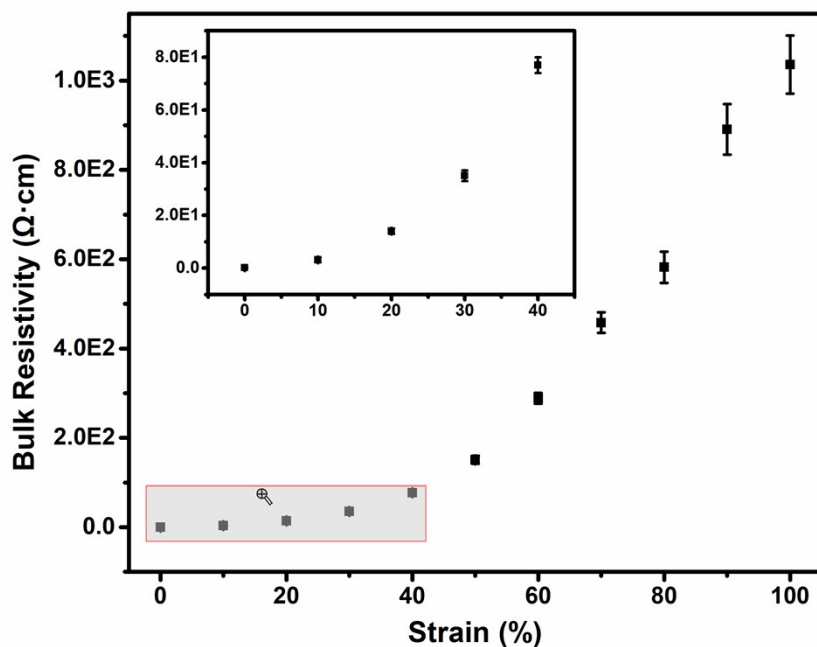

**Figure S6.** Electrical resistivity of RCFA filled with pristine MWCNTs and urea-g-MWCNTs under stretching deformation.

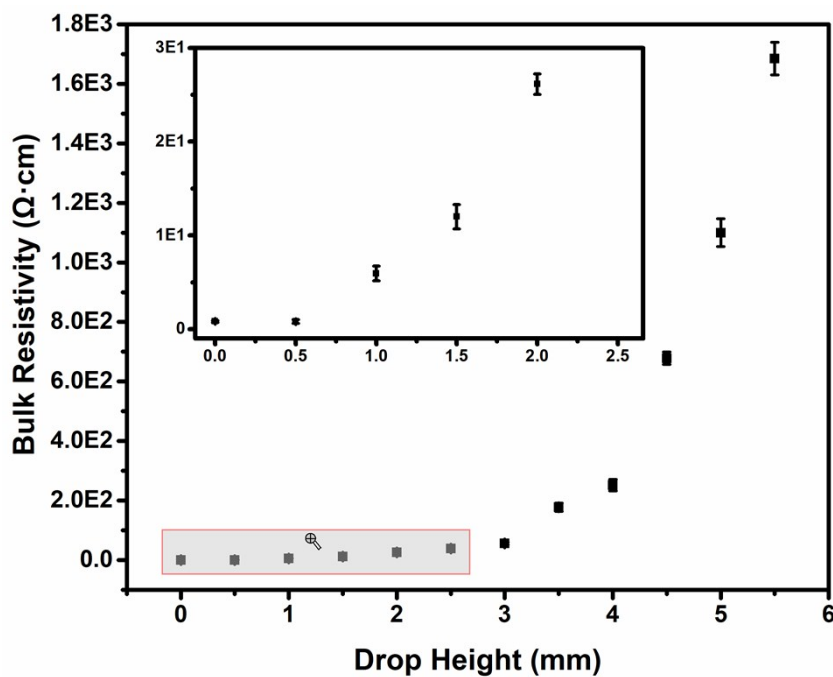

**Figure S7.** Electrical resistivity of RCFA filled with pristine MWCNTs and urea-g-MWCNTs under bending deformation.

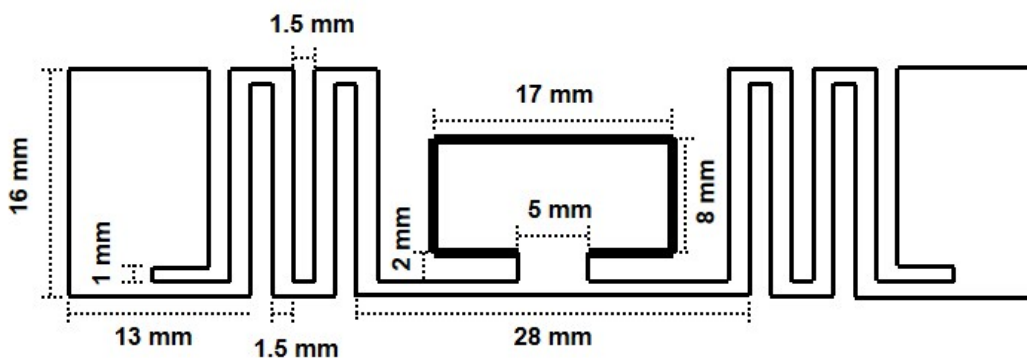

**Figure S8.** Geometry of RFID tag antenna.

The impedance value of Alien H3 RFID chip is  $30-j110 \Omega$ . Thus, we designed the antenna with the impedance value of  $30+j110 \Omega$  so as to conjugate match with the chip[14].

## REFERENCES

- [1] Li, J.; Zhang, G.; Sun, R.; Wong, C, -P. A Covalently Cross-Linked Reduced Functionalized Graphene Oxide/Polyurethane Composite Based on Diels-Alder Chemistry and Its Potential Application in Healable Flexible Electronics. *J. Mater. Chem. C* 2017, 5, 220-280.
- [2] Fu, G.; Yuan, L.; Liang, G.; Gu, A. Heat-Resistance Polyurethane Film with Great Electrostatic Dissipation Capacity and Very High Thermally Reversible Self-Healing Efficiency Based on Multi-Furan and Liquid Multi-Maleimide Polymers. *J. Mater. Chem. A* 2016, 4, 4232-4241.
- [3] Lei, Z.; Xie, P.; Rong, M.; Zhang, M. Catalyst-Free Dynamic Exchange of Aromatic Schiff base Bonds and Its Application to Self-healing and

Remolding of Crosslinked Polymers. *J. Mater. Chem. A* 2015, 3, 19662-19668.

[4] Chen, Y.; Tang, Z.; Zhang, X.; Liu, Y.; Wu, S.; Guo, B. Covalently Cross-Linked Elastomers with Self-Healing and Malleable Abilities Enabled by Boronic Ester Bonds. *ACS Appl. Mater. Interfaces* 2018, 10, 24224-24231.

[5] Wang, D.; Guo, J.; Zhang, H.; Cheng, B.; Shen, H.; Zhao, N.; Xu, J. Intelligent Rubber with Tailored Properties for Self-Healing and Shape Memory. *J. Mater. Chem. A* 2015, 3, 12864-12872.

[6] Lin, C.; Sheng, D.; Liu, X.; Xu, S.; Ji, F.; Dong, L.; Zhou, Y.; Yang, Y. A Self-Healable Nanocomposite Based on Dual-Crosslinked Graphene Oxide/Polyurethane. *Polymer* 2017, 127, 241-250.

[7] Rekondo, A.; Martin, R.; de Luzuriaga, A. R.; Cabanero, G.; Grande, H. J.; Odriozola, I. Catalyst-Free Room-Temperature Self-Healing Elastomers Based on Aromatic Disulfide Metathesis. *Mater. Horiz.* 2014, 1, 237-240.

[8] Imato, K.; Takahara, A.; Otsuka, H. Self-Healing of a Cross-Linked Polymer with Dynamic Covalent Linkages at Mild Temperature and Evaluation at Macroscopic and Molecular Levels. *Macromolecules* 2015, 48, 5632-5639.

[9] Mei, J.; Jia, X.; Lai, J.; Sun, Y.; Li, C.; Wu, J.; Cao, Y.; You, X.; Bao, Z.



A Highly Stretchable and Autonomous Self-Healing Polymer Based on Combination of Pt···Pt and  $\pi$ - $\pi$  Interactions. *Macromol. Rapid Commun.* 2016, 37, 1667-1675.

[10] Li, C.; Wang, C.; Keplinger, C.; Zuo, J.; Jin, L.; Sun, Y.; Zheng, P.; Cao, Y.; Lissel, F.; Linder, C.; You, X.; Bao, Z. A Highly Stretchable Autonomous Self-healing Elastomer. *Nat. Chem.* 2016, 8, 618-624.

[11] Xiang, H.; Rong, M.; Zhang, M. A Facile Method for Imparting Sunlight Driven Catalyst-Free Self-Healability and Recyclability to Commercial Silicone Elastomer. *Polymer* 2017, 108, 339-347.

[12] Lu, Y.; Guan, Z. Olefin Metathesis for Effective Polymer Healing via Dynamic Exchange of Strong Carbon-Carbon Double Bonds. *J. Am. Chem. Soc.* 2012, 134, 14226-14231.

[13] Canadell, J.; Goossens, H.; Klumperman, B. Self-Healing Materials Based on Disulfide Links. *Macromolecules* 2011, 44, 2536-2541.

[14] Son, H. -W.; Pyo, C. -S. Design of RFID Tag Antennas Using An Inductively Coupled Feed. *Electron Lett.* 2005, 41, 994-996.
